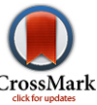

## Correction

# Correction: NhaA Na<sup>+</sup>/H<sup>+</sup> Antiporter Mutants That Hardly React to the Membrane Potential

## The PLOS ONE Staff

The third author's name is spelled incorrectly. The correct name is: Maral Budak. The correct citation is: Alkoby D, Rimon A, Budak M, Patino-Ruiz M, Călinescu O, et al. (2014) NhaA Na<sup>+</sup>/H<sup>+</sup> Antiporter Mutants That Hardly React to the Membrane Potential. PLoS ONE 9(4): e93200. doi:10.1371/journal.pone.0093200

## Reference

1. Alkoby D, Rimon A, Burdak M, Patino-Ruiz M, Călinescu O, et al. (2014) NhaA Na<sup>+</sup>/H<sup>+</sup> Antiporter Mutants That Hardly React to the Membrane Potential. PLoS ONE 9(4): e93200. doi:10.1371/journal.pone.0093200

---

**Citation:** The PLOS ONE Staff (2014) Correction: NhaA Na<sup>+</sup>/H<sup>+</sup> Antiporter Mutants That Hardly React to the Membrane Potential. PLoS ONE 9(7): e102206. doi:10.1371/journal.pone.0102206

**Published:** July 17, 2014

**Copyright:** © 2014 The PLOS ONE Staff. This is an open-access article distributed under the terms of the Creative Commons Attribution License, which permits unrestricted use, distribution, and reproduction in any medium, provided the original author and source are credited.
